# Supplementary material for: Sugar-Sweetened Beverages and Symptom Complaints among School-Aged Children: A National Longitudinal Study
Source: MDPI journal article supplement (doi:10.3390/nu14030406), 2022-01-18
Supplement: s1 [file s1]

Table S1. Odds ratio and 95% confidence interval of inflammation-related symptom prevalence among different sugar-sweet beverage intake. (only included Han ethnic background children, n=11707) <sup>a</sup>.

|                                       | Never    |        | Small mount            |        | Large mount                  |        |
|---------------------------------------|----------|--------|------------------------|--------|------------------------------|--------|
| Sugar sweet beverage intake mount     | Referent | n=4107 | 1.20 (0.99-1.44)       | n=4597 | 1.57 (1.17-2.10)             | n=3033 |
|                                       | Never    |        | Twice or less per week |        | Three or more times per week |        |
| Sugar sweet beverage intake Frequency | Referent | n=4175 | 0.83 (0.69-1.01)       | n=5350 | 0.77 (0.56-1.04)             | n=2355 |

<sup>a</sup> adjusted child age, gender, one child, household income, residence, research area, maternal education level, moderate physical activity time, sedentary lifestyle time, sleep duration, low birth weight, and if breastfeeding longer than 6 months.
